# Supplementary material
Source: PubMed Central journal article supplement (PMC2563999)
Supplement: supp_15_1_65__1.pdf [file supp_15_1_65__1.pdf]

## Appendix 1 Description of potential prognostic determinants mentioned in literature

| Category* | Determinant                              | Category                                        | Description                                                                                                                    |
|-----------|------------------------------------------|-------------------------------------------------|--------------------------------------------------------------------------------------------------------------------------------|
| 1, 3      | Age[14, 27, 28]†                         | In years                                        |                                                                                                                                |
| 1         | Medical specialty†                       | Surgery, Medical,<br>Neurology or<br>Geriatrics |                                                                                                                                |
| 1         | Sex[27]                                  | Male, female                                    |                                                                                                                                |
| 2, 3      | Weight at admission[14]†                 | In kg                                           |                                                                                                                                |
|           | Height[14]                               | In cm                                           |                                                                                                                                |
| 2, 3      | Body mass index at<br>admission[14, 27]† | Weight/height <sup>2</sup>                      |                                                                                                                                |
| 3         | Malnutrition at<br>admission[14]         | Yes/no                                          | >5% weight loss in 1♣month or >10%<br>weight loss in 6♣months prior to admission                                               |
| 3         | Current smoking[14, 27]                  | Yes/no                                          |                                                                                                                                |
| 2, 3      | Neurological<br>impairment[28]           | No                                              | Minor impairment<br>Sensibility impaired<br>Hemiplegic<br>Spinal cord lesion<br>above th 6<br>Spinal cord lesion<br>under th 6 |
| 2,3       | General physical<br>condition[29]        | Good                                            |                                                                                                                                |

| Category* | Determinant              | Category             | Description                                                                                                                     |
|-----------|--------------------------|----------------------|---------------------------------------------------------------------------------------------------------------------------------|
|           |                          | Fair                 |                                                                                                                                 |
|           |                          | Poor                 |                                                                                                                                 |
|           |                          | Very bad             |                                                                                                                                 |
| 2         | Mental condition[28, 29] | Alert                |                                                                                                                                 |
|           |                          | Listless/drowsy      |                                                                                                                                 |
|           |                          | Confused             |                                                                                                                                 |
|           |                          | Severe               |                                                                                                                                 |
|           |                          | depression/apathetic |                                                                                                                                 |
|           |                          | Stupor/coma          |                                                                                                                                 |
|           |                          | Sedated              |                                                                                                                                 |
| 2         | Mobility[14, 27–30]†     | No limitation        | Makes major and frequent changes in position without assistance.                                                                |
|           |                          | Slightly limited     | Makes frequent though slight changes in body or extremity position independently.                                               |
|           |                          | Very limited         | Makes occasional slight changes in body or extremity position but unable to make frequent or significant changes independently. |
|           |                          | Completely immobile  | Does not make even slight changes in body or extremity position without assistance.                                             |
| 2         | Activity[14, 28–30]†     | Walks frequently     | Walks outside the room at least twice a day and inside room at least once every two hours during waking hours.                  |
|           |                          | Walks occasionally   | Walks occasionally during day but for very                                                                                      |

| Category* | Determinant               | Category         | Description                                                                                                                                                                                                 |
|-----------|---------------------------|------------------|-------------------------------------------------------------------------------------------------------------------------------------------------------------------------------------------------------------|
|           |                           |                  | short distances, with or without assistance.                                                                                                                                                                |
|           |                           |                  | Spends majority of each shift in bed or chair.                                                                                                                                                              |
|           |                           | Chair fast       | Ability to walk severely limited or non-existent. Cannot bear weight and/or must be assisted into chair or wheelchair.                                                                                      |
|           |                           | Bed fast         | Confined to bed.                                                                                                                                                                                            |
| 2         | Sensory perception[27–30] | No impairment    | Responds to verbal commands. Has no sensory deficit which would limit ability to feel or voice pain or discomfort.                                                                                          |
|           |                           | Slightly limited | Responds to verbal commands but cannot always communicate discomfort or need to be turned<br><br>OR<br>Has some sensory impairment which limits ability to feel pain or discomfort in 1 or 2 extremities.   |
|           |                           | Very limited     | Responds only to painful stimuli. Cannot communicate discomfort except by moaning or restlessness<br><br>OR<br>Has a sensory impairment which limits the ability to feel pain or discomfort over half body. |

| <b>Category*</b> | <b>Determinant</b>      | <b>Category</b>                                                                  | <b>Description</b>                                                                                                                                                                                                                                                                                                                                                                                |
|------------------|-------------------------|----------------------------------------------------------------------------------|---------------------------------------------------------------------------------------------------------------------------------------------------------------------------------------------------------------------------------------------------------------------------------------------------------------------------------------------------------------------------------------------------|
|                  |                         | Completely limited                                                               | Unresponsive (does not moan, flinch or grasp) to painful stimuli, due to diminished level of consciousness or sedation<br><br>OR<br><br>Limited ability to feel pain.                                                                                                                                                                                                                             |
| 2                | Urine catheter[27, 28]† | No<br><br>Foley catheter<br><br>Suprapubis catheter                              |                                                                                                                                                                                                                                                                                                                                                                                                   |
| 2                | Incontinence[27–30]†    | Not<br><br>Occasional<br><br>Usually/urine<br><br>Usually/feces<br><br>Doubly    |                                                                                                                                                                                                                                                                                                                                                                                                   |
| 2                | Moisture[30]            | Rarely moist<br><br>Occasionally moist<br><br>Very moist<br><br>Constantly moist | Skin is usually dry; linen only requires changing at routine intervals.<br><br>Skin is occasionally moist, requiring an extra linen change approximately once a day.<br><br>Skin is often but not always moist. Linen must be changed at least once a shift.<br><br>Skin is kept moist almost constantly by perspiration, urine, etc. Dampness is detected every time patient is moved or turned. |

| Category* | Determinant                   | Category            | Description                                                                                                                                                                              |
|-----------|-------------------------------|---------------------|------------------------------------------------------------------------------------------------------------------------------------------------------------------------------------------|
| 3         | Normal skin[27]†              | Yes/no              |                                                                                                                                                                                          |
| 3         | Dry skin[27]†                 | Yes/no              |                                                                                                                                                                                          |
| 3         | Discoloration of skin[27]†    | Yes/no              | Not non-blanchable erythema (grade 1 pressure ulcer)                                                                                                                                     |
| 3         | Broken skin[27]               | Yes/no              | Not a pressure ulcer grade 2 or worse                                                                                                                                                    |
| 3         | Oedema (localized)[27]†       | Yes/no              |                                                                                                                                                                                          |
| 3         | Tube feeding[30]              | Yes/no              |                                                                                                                                                                                          |
| 3         | Total parenteral feeding[30]† | Yes/no              |                                                                                                                                                                                          |
| 3         | Oral feeding[14, 30]          | Excellent           | Eats most of every meal. Never refuses a meal. Usually eats a total of 4 or more servings of meat and dairy products. Occasionally eats between meals. Does not require supplementation. |
|           |                               | Adequate            | Eats over half of most meals. Eats a total of 4 servings of protein (meat or dairy products) each day. Occasionally will refuse a meal but will usually take a supplement if offered.    |
|           |                               | Probably inadequate | Rarely eats a complete meal and generally eats only about half of any food offered. Protein intake includes only 3 servings of meat or dairy products per day.                           |

| Category* | Determinant                   | Category           | Description                                                                                                                                                          |
|-----------|-------------------------------|--------------------|----------------------------------------------------------------------------------------------------------------------------------------------------------------------|
|           |                               |                    | Occasionally will take a dietary supplement.                                                                                                                         |
|           |                               | Very poor          | Never eats a complete meal. Rarely eats more than 1/3 of any food offered. Eats 2 servings or less of protein (meat or dairy products) per day. Takes fluids poorly. |
|           |                               | No                 | Does not take a liquid dietary supplement.                                                                                                                           |
| 3         | Appetite[27]                  | Good               | Is NPO                                                                                                                                                               |
|           |                               | Fair               | What the patient says                                                                                                                                                |
|           |                               | Poor               |                                                                                                                                                                      |
|           |                               | Very bad           |                                                                                                                                                                      |
| 3         | Nutritional condition[27, 28] | Good               |                                                                                                                                                                      |
|           |                               | Fair               | As if not having eaten for a few days or has eaten very badly.                                                                                                       |
|           |                               | Poor               | As if not having eaten for more than a week with vomiting or diarrhoea.                                                                                              |
|           |                               | Very bad/cachectic | As with terminal cancer patients                                                                                                                                     |
| 3         | Oral fluid intake[14, 30]     | >2♣litre           |                                                                                                                                                                      |
|           |                               | 1-2♣litre          |                                                                                                                                                                      |
|           |                               | <1♣litre           |                                                                                                                                                                      |
|           |                               | None               |                                                                                                                                                                      |
| 3         | IV drip[30]                   | Yes/no             |                                                                                                                                                                      |
| 2         | Friction and shear[14,        | No apparent        | Moves in bed and in chair independently                                                                                                                              |

| Category* | Determinant                | Category                                                | Description                                                                                                                                                                                                                                                                                        |
|-----------|----------------------------|---------------------------------------------------------|----------------------------------------------------------------------------------------------------------------------------------------------------------------------------------------------------------------------------------------------------------------------------------------------------|
|           | 30]†                       | problem                                                 | and has sufficient strength to lift up completely during move.<br>Maintains good position in bed or chair at all times.                                                                                                                                                                            |
|           |                            | Potential problem                                       | Moves feebly or requires minimum assistance. During a move skin probably slides to some extent against sheets, chair, restraints or other devices. Maintains relatively good position in chair or bed most of the time but occasionally slides down.                                               |
|           |                            | Problem                                                 | Requires moderate to maximum assistance in moving.<br>Complete lifting without sliding against sheets is impossible. Frequently slides down in bed or chair, requiring frequent repositioning with maximum assistance.<br>Spasticity, contractures or agitation leads to almost constant friction. |
| 3         | Medication use[14, 27, 28] | Categorized according to the pharmacological compendium | Painkillers, sleep medication, tranquilizers, antibiotics, β blockers, cytostatics, morphine, steroids, anticoagulants, other.                                                                                                                                                                     |
| 2         | Pain[15]                   | No pain or effective pain medication                    |                                                                                                                                                                                                                                                                                                    |

| Category* | Determinant                                             | Category                        | Description                                          |
|-----------|---------------------------------------------------------|---------------------------------|------------------------------------------------------|
|           |                                                         | Occasionally                    |                                                      |
|           |                                                         | Frequently                      |                                                      |
|           |                                                         | Constantly                      |                                                      |
| 3         | Fever[14, 28]                                           | Yes/no                          | Temperature >38.5°C                                  |
| 3         | Hypotension[14]                                         | Yes/no                          | Systolic BP <100♣mm♣Hg and/or diastolic BP <60♣mm♣Hg |
| 3         | Hypertension[14]                                        | Yes/no                          | Systolic BP >160♣mm♣Hg and/or diastolic BP >95♣mm♣Hg |
| 3         | Former pressure ulcer[21]†                              | Yes/no                          |                                                      |
| 3         | Hemoglobin level[14]†                                   | In 0.1♣mmol/l                   |                                                      |
| 3         | Leukocytes at admission[14]                             | Absolute count                  |                                                      |
| 3         | Albumin <35♣g/l at admission[14]                        | Yes/no                          |                                                      |
| 3         | Total protein <60♣g/l at admission[14]                  | Yes/no                          |                                                      |
| 3         | Lymphocyte count <1200♣mm <sup>3</sup> at admission[14] | Yes/no                          |                                                      |
| 3         | Co-morbidity, diagnosis, complications[14]              | Grouped according to ICD 9 code |                                                      |
| 3         | Diabetes[14, 27, 28]†                                   | Yes/no                          |                                                      |



| <b>Category*</b> | <b>Determinant</b>                       | <b>Category</b> | <b>Description</b> |
|------------------|------------------------------------------|-----------------|--------------------|
| 3                | Spinal cord lesion[14, 27, Yes/no<br>28] |                 |                    |
| 2                | Surgery[31]†                             | Yes/no          |                    |
| 2                | Length of surgery[31]†                   | In hours        |                    |

\*Category 1, demographic data; 2, risk factors influencing the duration and intensity of pressure and shearing forces; 3, risk indicators influencing tissue tolerance.

†Univariate analysis ( $p < 0.15$ ).
